# Supplementary material for: Assessment of N95 respirator decontamination and re-use for SARS-CoV-2
Source: PubMed Central journal article supplement (PMC7217083; doi:10.1101/2020.04.11.20062018), 2020-04-24
Supplement: NIHPP2020.04.11.20062018-supplement-1.pdf [file NIHPP2020.04.11.20062018-supplement-1.pdf]

|     |                            |         |
|-----|----------------------------|---------|
| 136 | <b>Table of contents:</b>  | page 1  |
| 137 | Supplemental methods       | page 2  |
| 138 | Supplemental table         | page 10 |
| 139 | Code and data availability | page 10 |
| 140 | Acknowledgements           | page 11 |
| 141 | Supplemental references    | page 11 |

## 142 **Supplemental methods**

### 143 *Short literature review on mask decontamination*

144 The COVID-19 pandemic has highlighted the necessity for large-scale decontamination procedures  
145 for personal protective equipment (PPE), in particular N95 respirator masks(1). SARS-CoV-2 has  
146 frequently been detected on PPE of healthcare workers(11). The environmental stability of SARS-CoV-2  
147 underscores the need for rapid and effective decontamination methods(12). Extensive literature is  
148 available for decontamination procedures for N95 respirators, using either bacterial spore inactivation  
149 tests, bacteria or respiratory viruses (e.g. influenza A virus)(3-6, 9, 13-15). Effective inactivation methods  
150 for these pathogens and surrogates include UV, ethylene oxide, vaporized hydrogen peroxide (VHP),  
151 gamma irradiation, ozone and dry heat(4, 5, 7, 9, 14-16). The filtration efficiency and N95 respirator fit  
152 has typically been less well explored, but suggest that both filtration efficiency and N95 respirator fit can  
153 be affected by the decontamination method used(7, 8). It will therefore be critical that FDA, CDC and  
154 OSHA guidelines with regards to fit testing, seal check and respirator re-use are followed(9, 17-20).

### 155 *Laboratory experiments*

#### 156 Viruses and titration

157 HCoV-19 nCoV-WA1-2020 (MN985325.1) was the SARS-CoV-2 strain used in our  
158 comparison(21). Virus was quantified by end-point titration on Vero E6 cells as described previously(22).  
159 Virus titrations were performed by end-point titration in Vero E6 cells. Cells were inoculated with 10-fold  
160 serial dilutions in four-fold of samples taken from N95 mask and stainless steel surfaces (see below). One  
161 hour after inoculation of cells, the inoculum was removed and replaced with 100  $\mu$ l (virus titration)  
162 DMEM (Sigma-Aldrich) supplemented with 2% fetal bovine serum, 1 mM L-glutamine, 50 U/ml  
163 penicillin and 50  $\mu$ g/ml streptomycin. Six days after inoculation, cytopathogenic effect was scored and  
164 the TCID<sub>50</sub> was calculated (see below). Wells presenting cytopathogenic effects due to media toxicity

165 (e.g., due to the presence of ethanol or hydrogen peroxide) rather than viral infection were removed from  
166 the titer inference procedure.

#### 167 N95 and stainless steel surface

168 N95 material discs were made by punching 9/16" (15 mm) fabric discs from N95 respirators,  
169 AOSafety N9504C respirators (Aearo Company Southbridge, MA). The stainless steel 304 alloy discs  
170 were purchased from Metal Remnants (<https://metalremnants.com/>) as described previously. 50  $\mu$ L of  
171 SARS-CoV-2 was spotted onto each disc. A 0 time-point measurement was taken prior to exposing the  
172 discs to the disinfection treatment. At each sampling time-point, discs were rinsed 5 times by passing the  
173 medium over the stainless steel or through the N95 disc. The medium was transferred to a vial and frozen  
174 at  $-80^{\circ}\text{C}$  until titration. All experimental conditions were performed in triplicate.

#### 175 Decontamination methods

176 *Ultraviolet light.* Plates with fabric and steel discs were placed under an LED high power UV germicidal  
177 lamp (effective UV wavelength 260-285nm) without the titanium mesh plate (LEDi2, Houston, Tx) 50  
178 cm from the UV source. At 50 cm the UVC power was measured by the manufacturer at  $550 \mu\text{W}/\text{cm}^2$ .  
179 Plates were removed at 10, 30 and 60 minutes and 1 mL of cell culture medium added. The energy the  
180 discs were exposed to at 10, 30 and 60 min is  $0.33 \text{ J}/\text{cm}^2$ ,  $0.99 \text{ J}/\text{cm}^2$ , and  $1.98 \text{ J}/\text{cm}^2$  respectively. While  
181 the CDC has no specific recommendations on the minimum dose, they do report that a  $1 \text{ J}/\text{cm}^2$  dose can  
182 reduce tested viable viral loads by 99.9%<sup>4</sup>.

183 *Heat treatment.* Plates with fabric and steel discs were placed in a  $70^{\circ}\text{C}$  oven. Plates were removed at 10,  
184 20, 30 and 60 minutes and 1 mL of cell culture medium added.

185 *70% ethanol.* Fabric and steel discs were placed into the wells of one 24 well plate per time-point and  
186 sprayed with 70% ethanol to saturation. The plate was tipped to near vertical and 5 passes of ethanol were

187 sprayed onto the discs from approximately 10 cm. After 10 minutes, 1 mL of cell culture medium was  
188 added.

189 *VHP*. Plates with fabric and steel discs were placed into a Panasonic MCO-19AIC-PT (PHC Corp. of  
190 North America Wood Dale, IL) incubator with VHP generation capabilities and exposed to hydrogen  
191 peroxide (approximately 1000 ppm). The exposure to VHP was 7 minutes, after the inactivation of the  
192 hydrogen peroxide, the plate was removed and 1 mL of cell culture medium was added.

193 *Control*. Plates with fabric and steel discs and steel plates were maintained at 21-23°C and 40% relative  
194 humidity for up to four days. After the designated time-points, 1 mL of cell culture medium was added.

#### 195 N95 mask integrity testing

196 N95 Mask (3M™ Aura™ Particulate Respirator 9211+/37193) integrity testing after 2 hours of wear  
197 and decontamination, for three consecutive rounds, was performed for a total of 6 times for each  
198 decontamination condition and control condition. Masks were worn by subjects and integrity was  
199 quantitatively determined using the Portacount Respirator fit tester (TSI, 8038) with the N95 companion  
200 component, following the modified ambient aerosol condensation nuclei counter quantitative fit test  
201 protocol approved by the OSHA<sup>18</sup>. Subjects were asked to bend over for 40 seconds, talk for 50 seconds,  
202 move head from side-to-side for 50 seconds, and move head up-and-down for 50 seconds whilst aerosols  
203 on inside and outside of mask were measured. By convention, this fit test is passed when the final score is  
204  $\geq 100$ . For the N95 integrity testing, a Honeywell Mistmate humidifier (cat#HUL520B) was used for  
205 particle generation.

#### 206 *Statistical analyses*

207 In the model notation that follows, the symbol  $\sim$  denotes that a random variable is distributed  
208 according to the given distribution. Normal distributions are parametrized as Normal(mean, standard  
209 deviation). Positive-constrained normal distributions (“Half-Normal”) are parametrized as Half-

210 Normal(mode, standard deviation). Normal distributions truncated to the interval [0, 1] are parameterized  
211 as TruncNormal(mode, standard deviation).

212 We use  $\langle \text{Distribution Name} \rangle \text{CDF}(x \mid \text{parameters})$  and  $\langle \text{Distribution Name} \rangle \text{CCDF}$  to denote the  
213 cumulative distribution function and complementary cumulative distribution functions of a probability  
214 distribution, respectively. So for example NormalCDF(5 | 0, 1) is the value of the Normal(0, 1)  
215 cumulative distribution function at 5.

216 We use  $\text{logit}(x)$  and  $\text{invlogit}(x)$  to denote the logit and inverse logit functions, respectively:

217 
$$\text{logit}(x) = \ln \frac{x}{1-x} \quad (1)$$

218 
$$\text{invlogit}(x) = \frac{e^x}{1+e^x} \quad (2)$$

## 219 Mean titer inference

220 We inferred mean titers across sets of replicates using a Bayesian model. The  $\log_{10}$  titers  $v_{ijk}$  (the titer  
221 for the sample from replicate  $k$  of time-point  $j$  of experiment  $i$ ) were assumed to be normally distributed  
222 about a mean  $\mu_{ij}$  with a standard deviation  $\sigma$ . We placed a very weakly informative normal prior on the  
223  $\log_{10}$  mean titers  $\mu_{ij}$ :

224 
$$\mu_{ij} \sim \text{Normal}(3, 3) \quad (3)$$

225 We placed a weakly informative normal prior on the standard deviation:

226 
$$\sigma \sim \text{Normal}(0, 0.5) \quad (4)$$

227 We then modeled individual positive and negative wells for sample  $ijk$  according to a Poisson single-  
228 hit model(23). That is, the number of virions that successfully infect cells in a given well is Poisson  
229 distributed with mean:

230 
$$V = \ln(2) 10^v \quad (5)$$

231 where  $v$  is the  $\log_{10}$  virus titer in TCID<sub>50</sub>, where  $v$  is the  $\log_{10}$  virus titer in TCID<sub>50</sub>, and the well is infected  
232 if at least one virion successfully infects a cell. The value of the mean derives from the fact that our units  
233 are TCID<sub>50</sub>; the probability of infection at  $v = 0$ , i.e. 1 TCID<sub>50</sub>, is equal to  $1 - e^{-\ln(2) \times 1} = 0.5$ .

234 Let  $Y_{ijkl}$  be a binary variable indicating whether the  $l^{\text{th}}$  well of dilution factor  $d$  (expressed as  $\log_{10}$   
235 dilution factor) of sample  $ijk$  was positive (so  $Y_{ijkl} = 1$  if the well was positive and 0 otherwise), which  
236 will occur as long as at least one virion successfully infects a cell.

237 It follows from (5) that the conditional probability of observing  $Y_{ijkl} = 1$  given a true underlying titer  
238  $\log_{10}$  titer  $v_{ijk}$  is given by:

239 
$$L(Y_{ijkl} = 1 | v_{ijk}) = 1 - e^{-\ln(2) \times 10^x} \quad (6)$$

240 Where

241 
$$x = v_{ijk} - d \quad (7)$$

242 is the expected concentration, measured in  $\log_{10}$  TCID<sub>50</sub>, in the dilute sample. This is simply the  
243 probability that a Poisson random variable with mean  $(-\ln(2) \times 10^x)$  is greater than 0. Similarly, the  
244 conditional probability of observing  $Y_{ijkl} = 0$  given a true underlying titer  $\log_{10}$  titer  $v_{ijk}$  is given by:

245 
$$L(Y_{ijkl} = 0 | v_{ijk}) = e^{-\ln(2) \times 10^x} \quad (8)$$

246 which is the probability that the Poisson random variable is 0.

247 This gives us our likelihood function, assuming independence of outcomes across wells.

248 Virus inactivation regression

249 The durations of detectability depend on the decontamination treatment but also initial inoculum and  
250 sampling method, as expected. We therefore estimated the decay rates of viable virus titers using a  
251 Bayesian regression analogous to that used in van Doremalen et al., 2020(12). This modeling approach  
252 allowed us to account for differences in initial inoculum levels across replicates as well as other sources  
253 of experimental noise. The model yields estimates of posterior distributions of viral decay rates and half-  
254 lives in the various experimental conditions – that is, estimates of the range of plausible values for these  
255 parameters given our data, with an estimate of the overall uncertainty(24).

256 Our data consist of 10 experimental conditions: 2 materials (N95 masks and stainless steel) by 5  
257 treatments (no treatment, ethanol, heat, UV and VHP). Each has three replicates, and multiple time-points  
258 for each replicate. We analyze the two materials separately. For each, we denote by  $Y_{ijkl}$  the positive or  
259 negative status (see above) for well  $l$  which has dilution  $d$  for the titer  $v_{ijk}$  from experimental condition  $i$   
260 during replicate  $j$  at time-point  $k$ .

261 We model each replicate  $j$  for experimental condition  $i$  as starting with some true initial  $\log_{10}$  titer  
262  $v_{ij}(0) = v_{ij0}$ . We assume that viruses in experimental condition  $i$  decay exponentially at a rate  $\lambda_i$  over time  $t$ .  
263 It follows that:

264 
$$v_{ij}(t) = v_{ij0} - \lambda_i t \quad (9)$$

265 We use the direct-from-well data likelihood function described above, except that now instead of  
266 estimating titer distribution about a shared mean  $\mu_{ij}$  we estimate  $\lambda_i$  under the assumptions that our  
267 observed well data  $Y_{ijkl}$  reflect the titers  $v_{ij}(t)$ .

### 268 *Regression prior distributions*

269 We place a weakly informative Normal prior distribution on the initial  $\log_{10}$  titers  $v_{ij0}$  to rule out  
270 implausibly large or small values (e.g. in this case undetectable  $\log_{10}$  titers or  $\log_{10}$  titers much higher than  
271 the deposited concentration), while allowing the data to determine estimates within plausible ranges:

272 
$$v_{ij0} \sim \text{Normal}(4.5, 2) \quad (10)$$

273 We placed a weakly informative Half-Normal prior on the exponential decay rates  $\lambda_i$ :

274 
$$\lambda_i \sim \text{Half-Normal}(0.5, 4) \quad (11)$$

275 Our plated samples were of volume 0.1 mL, so inferred titers were incremented by 1 to convert to  
276 units of  $\log_{10}$  TCID<sub>50</sub>/mL.

277 Mask integrity estimation

278 To quantify the decay of mask integrity after repeated decontamination, we used a logit-linear spline  
279 Bayesian regression to estimate the rate of degradation of mask fit factors over time, accounting for the  
280 fact that fit factors are interval-censored ratios. Fit factors are defined as the ratio of exterior  
281 concentration to interior concentration of a test aerosol. They are reported to the nearest integer, up to a  
282 maximum readout of 200, but arbitrarily large true fit factors are possible as the mask performance  
283 approaches perfect filtration.

284 We had 6 replicate masks  $j$  for each of 5 treatments  $i$  (no decontamination, ethanol, heat, UV and  
285 VHP). Each mask  $j$  was assessed for fit factor at 4 time-points  $k$ : before decontamination, and then after 1,  
286 2, and 3 decontamination cycles. We label the control treatment  $i = 0$ . So we denote by  $F_{ijk}$  the fit factor  
287 for the  $j^{\text{th}}$  mask from the  $i^{\text{th}}$  treatment after  $k$  decontaminations (with  $k = 0$  for the initial value).

288 We first converted fit factors  $F_{ijk}$  to the equivalent observed filtration rate  $Y_{ijk}$  by:

289 
$$Y = 1 - 1/F \quad (12)$$

290 *Observation model and likelihood function*



291 We modeled the censored observation process as follows.  $\text{logit}(Y_{ijk})$  values are observed with  
292 Gaussian error about the true filtration  $\text{logit}(p_{ijk})$ , with an unknown standard deviation  $\sigma_o$ , and then  
293 converted to fit factors, which are then censored:

$$294 \quad \text{logit}(Y_{ijk}) \sim \text{Normal}(\text{logit}(p_{ijk}), \sigma_o) \quad (13)$$

295 Because our reported fit factors are known to be within integer values and right-censored at 200, for  
296  $F_{ijk} \geq 200$  we have a conditional probability of observing the data given the parameters of

$$297 \quad L(F_{ijk} | p_{ijk}, \sigma_o) = \text{NormalCCDF}(\text{logit}(1 - 1/200) | \text{logit}(p_{ijk}) \sigma_o) \quad (14)$$

298 That is, we calculate the probability of observing a value of  $F$  greater than or equal to 200 (equivalent a  
299 value of  $Y$  greater than or equal to  $1 - 1/200$ ), given our parameters.

300 For  $1.5 \leq F_{ijk} < 200$ , we first calculate the upper and lower bounds of our observation  $Y^+_{ijk} = 1 - 1 /$   
301  $(F_{ijk} - 0.5)$  and  $Y^-_{ijk} = 1 - 1 / (F_{ijk} - 0.5)$ . Then:

$$302 \quad L(F_{ijk} | p_{ijk}, \sigma_o) = \text{NormalCDF}(\text{logit}(Y^+_{ijk}) | \text{logit}(p_{ijk}) \sigma_o) - \\ 303 \quad \text{NormalCDF}(\text{logit}(Y^-_{ijk}) | \text{logit}(p_{ijk}) \sigma_o) \quad (15)$$

304 That is, we calculate the probability of observing a value between  $Y^+_{ijk}$  and  $Y^-_{ijk}$ , given our parameters.

305 *Decay model*

306 We assumed that each mask had some true initial filtration rate  $p_{ij0}$ . We assumed that these were  
307 logit-normally distributed about some unknown mean mask initial filtration rate  $p_{avg}$  with a standard  
308 deviation  $\sigma_p$ , that is:

309 
$$\text{logit}(p_{ij0}) \sim \text{Normal}(\text{logit}(p_{avg}), \sigma_p) \quad (16)$$

310 We then assumed that the logit of the filtration rate,  $\text{logit}(p_{ijk})$ , decreased after each decontamination  
311 by a quantity  $d_{0k} + d_{ik}$ , where  $d_{0k}$  is natural degradation during the  $k^{\text{th}}$  trial in the absence of  
312 decontamination (i.e. the degradation rate in the control treatment,  $i = 0$ ), and  $d_{ik}$  is the additional  
313 degrading effect of the  $k^{\text{th}}$  decontamination treatment of type  $i > 0$ ). So for  $k = 1, 2, 3$  and  $i > 0$ :

314 
$$\text{logit}(p_{ijk}) = \text{logit}(p_{ij(k-1)}) - (d_{0k} + d_{ik}) + \varepsilon_{ijk} \quad (17)$$

315 where  $\varepsilon_{ijk}$  is a normally-distributed error term with an inferred standard deviation  $\sigma_{\varepsilon_{ijk}}$  for each treatment  
316 and decontamination level.

317 
$$\varepsilon_{ijk} \sim \text{Normal}(0, \sigma_{\varepsilon_{ijk}}) \quad (18)$$

318 And for the control  $i = 0$ :

319 
$$\text{logit}(p_{0jk}) = \text{logit}(p_{0j(k-1)}) - d_{0k} + \varepsilon_{0jk} \quad (19)$$

320 *Model prior distributions*

321 We placed a weakly informative Half-Normal prior on the control degradation rate  $d_0$ :

322 
$$d_0 \sim \text{Half-Normal}(0, 0.5) \quad (20)$$

323 We placed a weakly informative Half-Normal prior on the non-control degradation rates  $d_i, i > 0$ :

324 
$$d_i \sim \text{Half-Normal}(0.25, 0.5) \quad (21)$$

325 reflecting the conservative assumption that decontamination should degrade the mask at least somewhat.

326 We placed a Truncated Normal prior on the mean initial filtration  $p_{avg}$ :

327 
$$p_{avg} \sim \text{TruncNormal}(0.995, 0.02) \quad (22)$$

328 The mode of 0.995 corresponds to the maximum measurable fit factor of 200. The standard deviation of  
329 0.02 leaves it plausible that some masks could start near or below the minimum acceptable threshold fit  
330 factor of 100, which corresponds to a  $p$  of 0.99.

331 We placed weakly informative Half-Normal priors on the logit-space standard deviations  $\sigma_p$ ,  $\sigma_{eik}$ , and  
332  $\sigma_o$ .  $\sigma_p$  reflects variation in individual masks' initial filtration about  $p_{avg}$ . The various  $\sigma_{eik}$  reflect variation in  
333 masks' true degree of degradation between decontaminations about the expected degree of decay, and  $\sigma_o$   
334 reflects noise in the observation process.

335 
$$\sigma_p, \sigma_o \sim \text{Half-Normal}(0, 0.5)$$
  
336 (23)

337 
$$\sigma_{eik} \sim \text{Half-Normal}(0, 0.33)$$

338 We chose standard deviations less than or equal to 0.5 for these normal hyperpriors because a  
339 standard deviation of 1.5 (i.e.  $3\sigma$  in the hyperprior) in logit space corresponds to probability values being  
340 uniformly distributed between 0 and 1; we therefore wish to tell our model not to use larger values of  $\sigma_p$ ,  
341  $\sigma_o$ , or  $\sigma_{eik}$ , as these would squash all  $p_{ijk}$  to one of two modes, one at 0 and one at 1(25).

342 Markov Chain Monte Carlo Methods

343 For all Bayesian models, we drew posterior samples using Stan (Stan Core Team 2018), which  
344 implements a No-U-Turn Sampler (a form of Markov Chain Monte Carlo), via its R interface RStan. We  
345 ran four replicate chains from random initial conditions for 2000 iterations, with the first 1000 iterations  
346 as a warmup/adaptation period. We saved the final 1000 iterations from each chain, giving us a total of  
347 4000 posterior samples. We assessed convergence by inspecting trace plots and examining  $R^2$  and  
348 effective sample size ( $n_{eff}$ ) statistics.

#### 349 Limit of detection (LOD)

350 End-point titration has an approximate limit of detection set by the volume of the undilute sample  
351 deposited in each well. If all wells – including those containing undiluted sample – are negative and a  
352 Poisson single-hit model is used, the best guess is that the true titer lies somewhere below  $1 \text{ TCID}_{50} /$   
353 (volume of deposited sample). How far below is determined by the number of wells. For four wells, as  
354 was standard in our experiments, the first quarter  $\log_{10}$  titer at which 0 wells is the most likely outcome is  
355  $10^{-0.5} \text{ TCID}_{50}$  per volume of sample. This is also the imputed Spearman-Kärber titer in that case. Since we  
356 used samples of volume 0.1 mL, this corresponds to a value of  $10^{0.5} \text{ TCID}_{50}/\text{mL}$ . So although we do not  
357 use the Spearman-Kärber method here (since we infer mean titers directly from the well data) we use that  
358 LOD value to plot samples for which no replicate had a positive well (since the posterior distribution in  
359 that case covers a wide-range of sub-threshold values).

#### 360 **Supplemental table**

361 Table S1. Effect of decontamination method on SARS-CoV-2 viability. Results are reported as the  
362 median and upper- and lower-limits of the 95% credible interval of the estimated half-life, and time  
363 needed to reduce viable SARS-CoV-2 load by a factor of one thousand or one million, based on the  
364 posterior distribution of the exponential decay rate of the virus on different materials following different  
365 decontamination treatments.

| Treatment | Material | Half-life (min) |       |       | Time to one thousandth (min) |                    |                    | Time to one millionth (min) |                    |                    |
|-----------|----------|-----------------|-------|-------|------------------------------|--------------------|--------------------|-----------------------------|--------------------|--------------------|
|           |          | Median          | 2.5%  | 97.5% | Median                       | 2.5%               | 97.5%              | Median                      | 2.5%               | 97.5%              |
| Control   | N95 mask | 78.7            | 66.1  | 90.4  | 784                          | 659                | 901                | $1.57 \times 10^3$          | $1.32 \times 10^3$ | $1.8 \times 10^3$  |
|           | Steel    | 290             | 244   | 327   | $2.89 \times 10^3$           | $2.43 \times 10^3$ | $3.26 \times 10^3$ | $5.77 \times 10^3$          | $4.86 \times 10^3$ | $6.53 \times 10^3$ |
| Ethanol   | N95 mask | 0.647           | 0.557 | 0.733 | 6.45                         | 5.55               | 7.31               | 12.9                        | 11.1               | 14.6               |
|           | Steel    | 1.08            | 0.895 | 1.26  | 10.8                         | 8.92               | 12.5               | 21.6                        | 17.8               | 23.1               |
| Heat      | N95 mask | 4.7             | 3.93  | 5.48  | 46.9                         | 39.2               | 54.6               | 93.7                        | 78.4               | 109                |
|           | Steel    | 8.85            | 7.42  | 10.2  | 88.1                         | 74                 | 101                | 176                         | 148                | 201                |
| UV        | N95 mask | 6.12            | 5.27  | 6.87  | 61                           | 52.6               | 68.5               | 122                         | 105                | 137                |
|           | Steel    | 0.736           | 0.651 | 0.805 | 7.33                         | 6.48               | 8.02               | 14.7                        | 13                 | 16.6               |
| VHP       | N95 mask | 0.999           | 0.83  | 1.14  | 9.95                         | 8.27               | 11.3               | 19.9                        | 16.5               | 22.7               |

|       |  |      |       |       |  |      |      |      |  |      |      |      |
|-------|--|------|-------|-------|--|------|------|------|--|------|------|------|
| Steel |  | 0.77 | 0.673 | 0.846 |  | 7.67 | 6.71 | 8.43 |  | 15.3 | 13.4 | 16.9 |
|-------|--|------|-------|-------|--|------|------|------|--|------|------|------|

366

367

368 **Code and data availability**

369 Code and data to reproduce the Bayesian estimation results and produce corresponding figures are  
370 archived online at OSF: <https://doi.org/10.17605/OSF.IO/mkg9b> and available on Github:  
371 <https://github.com/dylanhmorris/n95-decontamination>

## 372 **Acknowledgements**

373 We would like to thank Madison Hebner, Julia Port, Kimberly Meade-White, Irene Offei Owusu,  
374 Victoria Avanzato and Lizzette Perez-Perez for excellent technical assistance. This research was  
375 supported by the Intramural Research Program of the National Institute of Allergy and Infectious  
376 Diseases (NIAID), National Institutes of Health (NIH). JOL-S and AG were supported by the Defense  
377 Advanced Research Projects Agency DARPA PREEMPT # D18AC00031 and the UCLA AIDS Institute  
378 and Charity Treks, and JOL-S was supported by the U.S. National Science Foundation (DEB-1557022),  
379 the Strategic Environmental Research and Development Program (SERDP, RC□2635) of the U.S.  
380 Department of Defense. Names of specific vendors, manufacturers, or products are included for public  
381 health and informational purposes; inclusion does not imply endorsement of the vendors, manufacturers,  
382 or products by the US Department of Health and Human Services.

## 383 **Supplemental references**

- 384 1. Ranney ML, Griffeth V, Jha AK. Critical Supply Shortages - The Need for Ventilators and  
385 Personal Protective Equipment during the Covid-19 Pandemic. *N Engl J Med*. 2020 Mar 25.
- 386 2. McMichael TM, Currie DW, Clark S, Pogosjans S, Kay M, Schwartz NG, et al. Epidemiology of  
387 Covid-19 in a Long-Term Care Facility in King County, Washington. *N Engl J Med*. 2020 Mar 27.
- 388 3. Batelle. Final Report for the Bioquell Hydrogen Peroxide Vapor (HPV) Decontamination for Reuse  
389 of N95 Respirators. 2016 [cited; Available from: <https://www.fda.gov/media/136386/download>
- 390 4. Fisher EM, Shaffer RE. A method to determine the available UV-C dose for the decontamination  
391 of filtering facepiece respirators. *J Appl Microbiol*. 2011 Jan;110(1):287-95.
- 392 5. Heimbuch BK, Wallace WH, Kinney K, Lumley AE, Wu CY, Woo MH, et al. A pandemic influenza  
393 preparedness study: use of energetic methods to decontaminate filtering facepiece respirators  
394 contaminated with H1N1 aerosols and droplets. *Am J Infect Control*. 2011 Feb;39(1):e1-9.
- 395 6. Lin TH, Tang FC, Hung PC, Hua ZC, Lai CY. Relative survival of *Bacillus subtilis* spores loaded  
396 on filtering facepiece respirators after five decontamination methods. *Indoor Air*. 2018 May 31.

- 397 7. Avilash Cramer ET, Sherryl H Yu, Mitchell Galanek, Edward Lamere, Ju Li, Rajiv Gupta, Michael  
398 P Short. disposable N95 masks pass qualitative fit-test but have decreases filtration efficiency after  
399 cobalt-60 gamma irradiation. MedRxiv.
- 400 8. Lin TH, Chen CC, Huang SH, Kuo CW, Lai CY, Lin WY. Filter quality of electret masks in filtering  
401 14.6-594 nm aerosol particles: Effects of five decontamination methods. PLoS One.  
402 2017;12(10):e0186217.
- 403 9. (NIOSH) TNIfOSaH. Decontamination and Reuse of Filtering Facepiece Respirators  
404 . 2020 [cited 2020 4/5/2020]; Available from: [https://www.cdc.gov/coronavirus/2019-ncov/hcp/ppe-](https://www.cdc.gov/coronavirus/2019-ncov/hcp/ppe-strategy/decontamination-reuse-respirators.html)  
405 [strategy/decontamination-reuse-respirators.html](https://www.cdc.gov/coronavirus/2019-ncov/hcp/ppe-strategy/decontamination-reuse-respirators.html)
- 406 10. CDC. Recommended Guidance for Extended Use and Limited Reuse of N95 Filtering Facepiece  
407 Respirators in Healthcare Settings. 2020 [cited; Available from:  
408 <https://www.cdc.gov/niosh/topics/hcwcontrols/recommendedguidanceextuse.html>
- 409 11. Ong SWX, Tan YK, Chia PY, Lee TH, Ng OT, Wong MSY, et al. Air, Surface Environmental, and  
410 Personal Protective Equipment Contamination by Severe Acute Respiratory Syndrome Coronavirus 2  
411 (SARS-CoV-2) From a Symptomatic Patient. JAMA. 2020 Mar 4.
- 412 12. van Doremalen N, Bushmaker T, Morris DH, Holbrook MG, Gamble A, Williamson BN, et al.  
413 Aerosol and Surface Stability of SARS-CoV-2 as Compared with SARS-CoV-1. N Engl J Med. 2020 Mar  
414 17.
- 415 13. Heimbuch BK, Kinney K, Lumley AE, Harnish DA, Bergman M, Wander JD. Cleaning of filtering  
416 facepiece respirators contaminated with mucin and Staphylococcus aureus. Am J Infect Control. 2014  
417 Mar;42(3):265-70.
- 418 14. Mills D, Harnish DA, Lawrence C, Sandoval-Powers M, Heimbuch BK. Ultraviolet germicidal  
419 irradiation of influenza-contaminated N95 filtering facepiece respirators. Am J Infect Control. 2018  
420 Jul;46(7):e49-e55.
- 421 15. Viscusi DJ, Bergman MS, Eimer BC, Shaffer RE. Evaluation of five decontamination methods for  
422 filtering facepiece respirators. Ann Occup Hyg. 2009 Nov;53(8):815-27.



- 423 16. CDC. Chemical Disinfectants, Guideline for Disinfection and Sterilization in Healthcare Facilities.  
424 2008 [cited; Available from: [https://www.cdc.gov/infectioncontrol/guidelines/disinfection/disinfection-  
426 methods/chemical.html#Hydrogen](https://www.cdc.gov/infectioncontrol/guidelines/disinfection/disinfection-<br/>425 methods/chemical.html#Hydrogen)  
427 17. FDA. N95 Respirators and Surgical Masks (Face Masks). 2020 [cited 2020 4/5/2020]; Available  
428 from: [https://www.fda.gov/medical-devices/personal-protective-equipment-infection-control/n95-  
430 respirators-and-surgical-masks-face-masks](https://www.fda.gov/medical-devices/personal-protective-equipment-infection-control/n95-<br/>429 respirators-and-surgical-masks-face-masks)  
431 18. Administration OSaH. Temporary Enforcement Guidance - Healthcare Respiratory Protection  
432 Annual Fit-Testing for N95 Filtering Facepieces During the COVID-19 Outbreak. 2020 [cited; Available  
433 from: [https://www.osha.gov/memos/2020-03-14/temporary-enforcement-guidance-healthcare-respiratory-  
435 protection-annual-fit](https://www.osha.gov/memos/2020-03-14/temporary-enforcement-guidance-healthcare-respiratory-<br/>434 protection-annual-fit)  
436 19. Administration OSaH. User Seal Check Procedures (Mandatory). 2020 [cited 2020 April 11];  
437 Available from: <https://www.osha.gov/laws-regs/regulations/standardnumber/1910/1910.134AppB1>  
438 20. Administration OSaH. Respirator Fit Testing [WWW Document]. U. S. Dep. Labo. 2012 [cited;  
439 Available from: [https://www.osha.gov/video/respiratory\\_protection/fittesting\\_transcript.html](https://www.osha.gov/video/respiratory_protection/fittesting_transcript.html) (accessed  
440 4.10.20).  
441 21. Holshue ML, DeBolt C, Lindquist S, Lofy KH, Wiesman J, Bruce H, et al. First Case of 2019 Novel  
442 Coronavirus in the United States. N Engl J Med. 2020 Jan 31.  
443 22. van Doremalen N, Bushmaker T, Munster VJ. Stability of Middle East respiratory syndrome  
444 coronavirus (MERS-CoV) under different environmental conditions. Euro Surveill. 2013 Sep 19;18(38).  
445 23. Brownie C, Statt J, Bauman P, Buczynski G, Skjolaas K, Lee D, et al. Estimating viral titres in  
446 solutions with low viral loads. Biologicals. 2011 Jul;39(4):224-30.  
447 24. Gelman A. Bayesian data analysis. Third edition. ed. Boca Raton: CRC Press; 2014.  
448 25. Northrup JM, Gerber BD. A comment on priors for Bayesian occupancy models. PLoS One.  
2018;13(2):e0192819.
